# Supplementary material for: Comprehensive Insight into Colorectal Cancer Metabolites and Lipids for Human Serum: A Proof-of-Concept Study
Source: MDPI journal article supplement (doi:10.3390/ijms24119614), 2023-06-01
Supplement: s1 [file s1]

## Supplementary Materials

# Comprehensive Insight into Colorectal Cancer Metabolites and Lipids for Human Serum: A Proof-of-Concept Study

Kinjal Bhatt <sup>1,\*</sup>, Tiziana Orlando<sup>1</sup>, Marie-Alice Meuwis <sup>2</sup>, Edouard Louis<sup>2</sup>, Pierre-Hugues Stefanuto <sup>1</sup>, and Jean-François Focant\* <sup>1</sup>

<sup>1</sup> Organic and Biological Analytical Chemistry Group (OBiAChem), MolSys, University of Liège, 4000 Liège, Belgium; [t.orlando@student.uliege.be](mailto:t.orlando@student.uliege.be) (T.O.); [phstefanuto@uliege.be](mailto:phstefanuto@uliege.be) (P.-H.S.).

<sup>2</sup> GIGA institute, Translational Gastroenterology and CHU de Liège, Hepato-Gastroenterology and Digestive Oncology, Quartier Hôpital, University of Liège, Avenue de l'Hôpital 13, B34-35, B-4000 Liège, Belgium; [marie-alice.meuw@ulg.ac.be](mailto:marie-alice.meuw@ulg.ac.be) (M.-A. M.); [edouard.louis@uliege.be](mailto:edouard.louis@uliege.be) (E.L.).

\* Correspondence: [kinjal.bhatt@uliege.be](mailto:kinjal.bhatt@uliege.be) or [ikinalbhatt@gmail.com](mailto:ikinalbhatt@gmail.com) (K.B.); [jf.focant@uliege.be](mailto:jf.focant@uliege.be) (J.-F.F.).

## Contents

Figure S1: Overview of the omics cascade

Figure S2: Lipidomics: Unsupervised screening with all features

Figure S3: Lipidomics: PCA score plot using significant features

Figure S4: Metabolomics: Unsupervised screening with all features

Figure S5: Metabolomics: Unsupervised screening with selected features

Figure S6: Lipidomics: QC Chart

Figure S7: Metabolomics: QC Chart

Table S1. Metabolomics: A systematic feature reduction step

## Omics Cascade

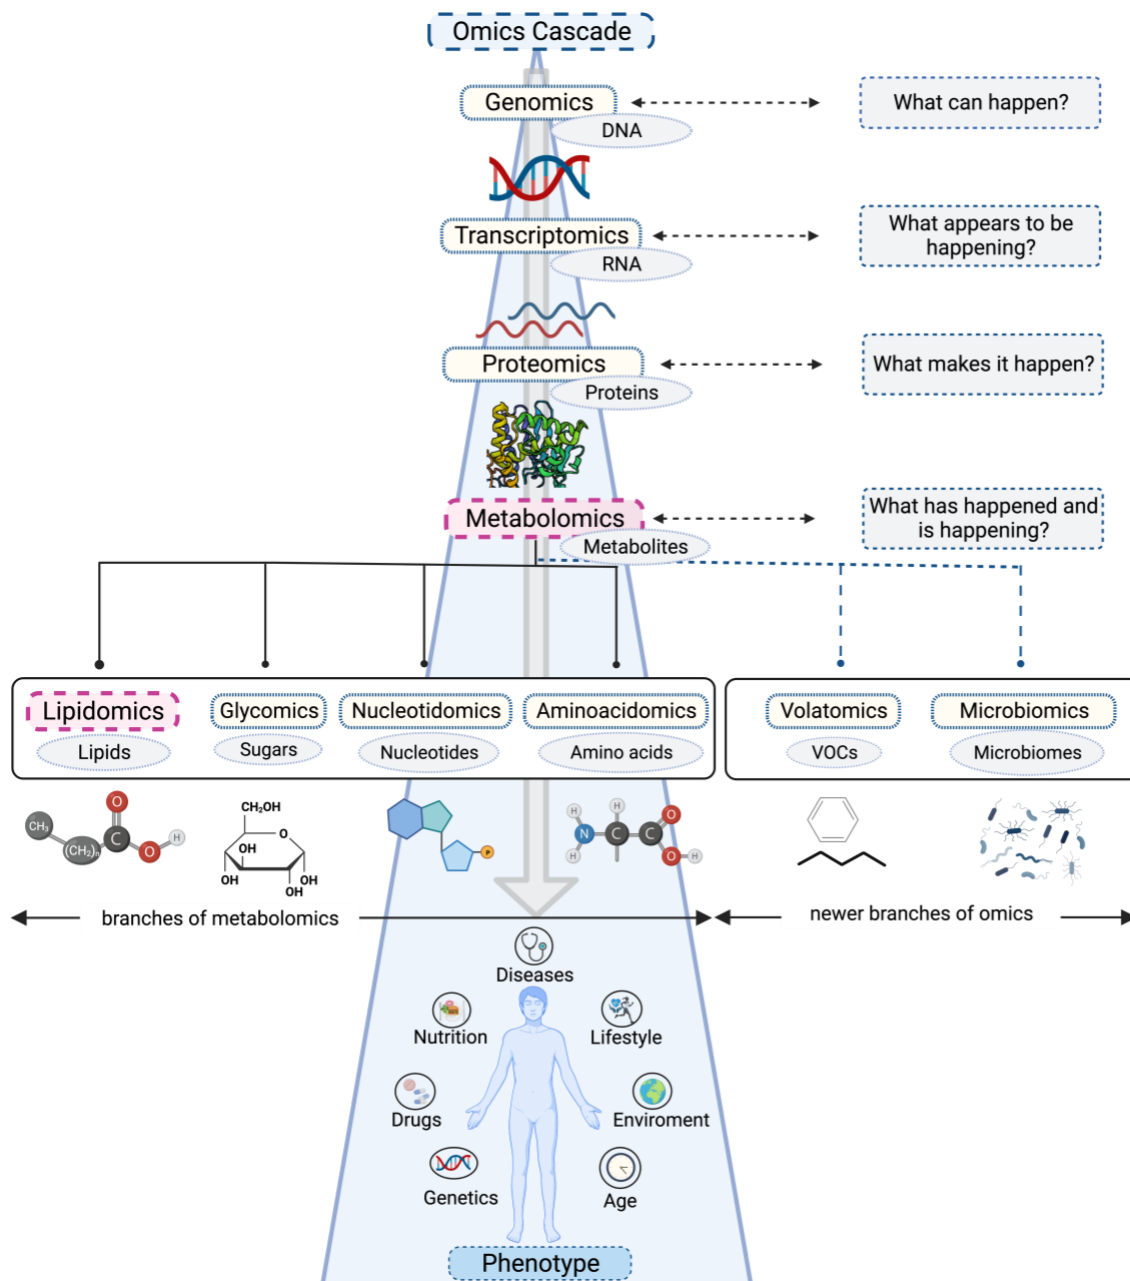

Figure S1: Overview of the omics cascade

## Lipidomics: Unsupervised screening with all features

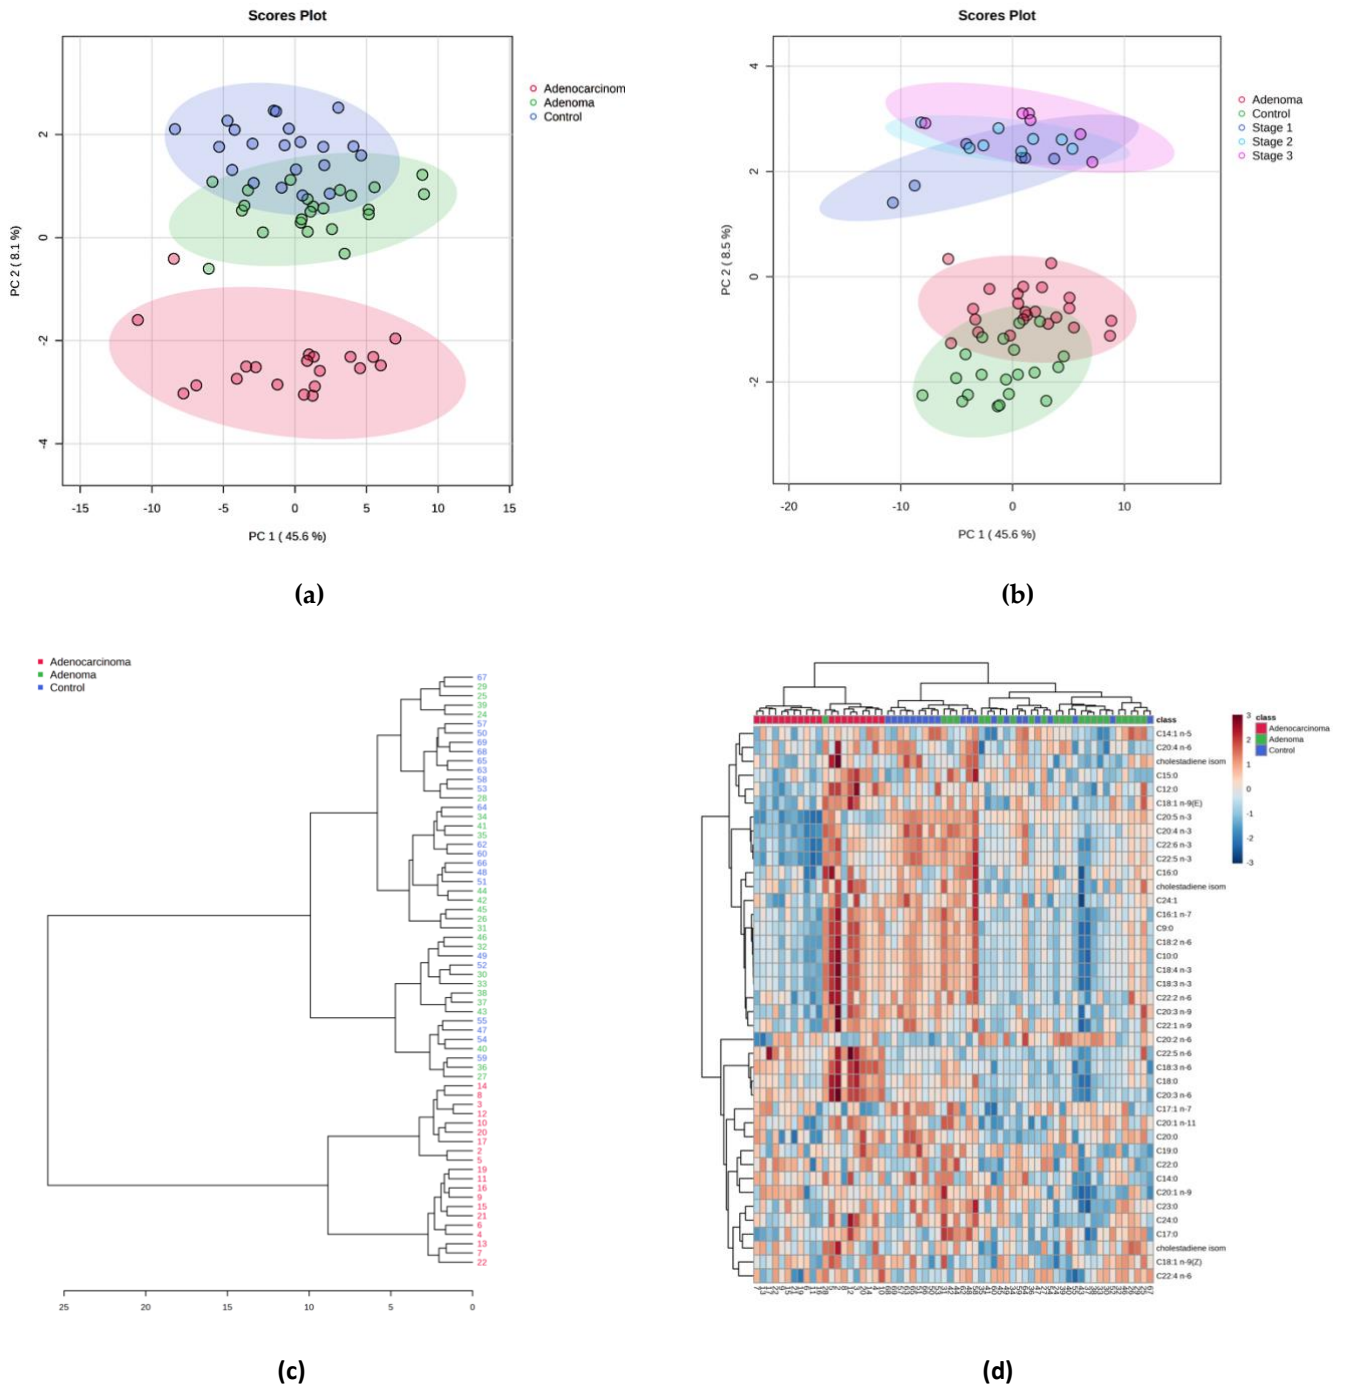

**Figure S2. Lipidomics: Unsupervised screening with all features** (a) PCA score plot for three different groups: control, adenoma, adenocarcinoma. (b) PCA score plot: Here, adenocarcinoma is divided in three stages based on pTNM staging: Stage 1, Stage 2, and stage 3 (c) Hierarchical Clustering Dendrogram (d) Heat map

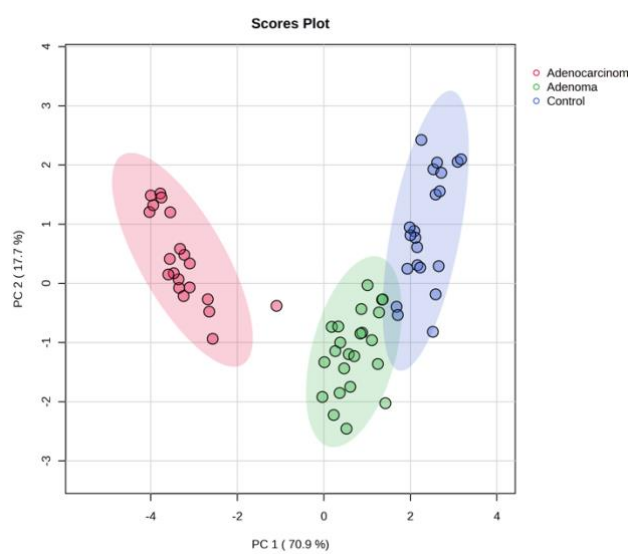

(a)

**Figure S3. Lipidomics: PCA score plot using significant features (adenocarcinoma, adenoma, and control).**

## Metabolomics Approach: Unsupervised screening with all features

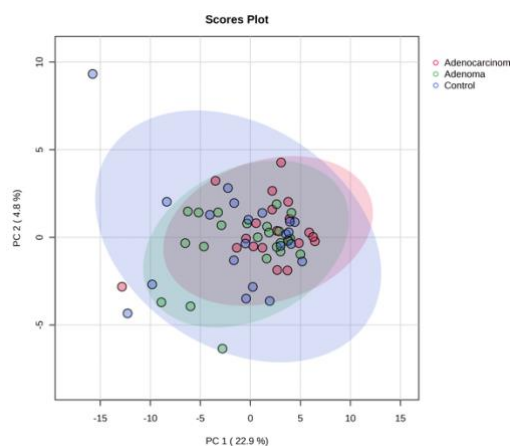

(a)

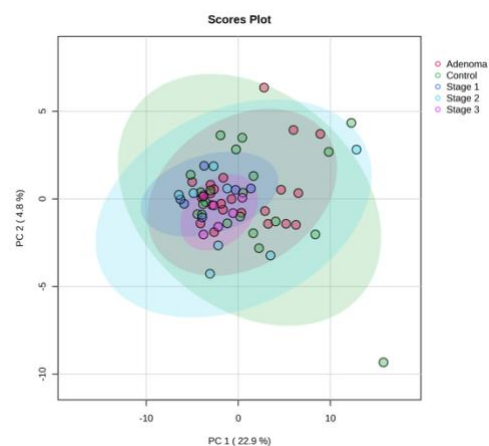

(b)

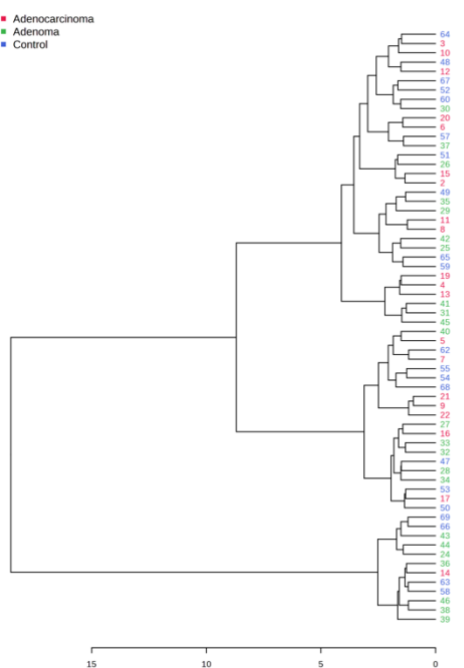

(c)

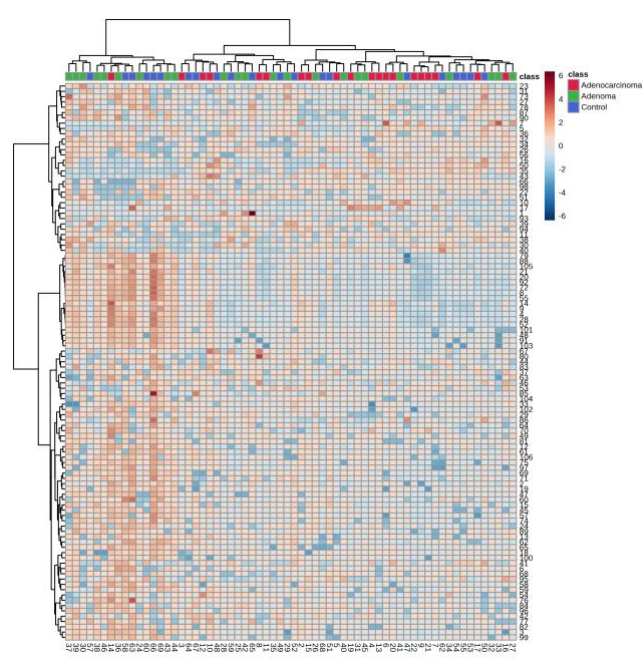

(d)

**Figure S4. Metabolomics: Unsupervised screening with all features** (a) PCA score plot for three different groups: control, adenoma, adenocarcinoma. (b) PCA score plot: Here, adenocarcinoma is divided in three stages based on pTNM staging: Stage 1, Stage 2, and stage 3 (c) Hierarchical Clustering Dendrogram (d) Heat map

## Metabolomics Approach: significant features

| Top feature | PLS-DA (Validation) |                |                | RF<br>(1000 trees) | RF<br>Confusion matrix (Class error) |         |         |
|-------------|---------------------|----------------|----------------|--------------------|--------------------------------------|---------|---------|
|             | Accuracy            | R <sup>2</sup> | Q <sup>2</sup> | OOB error          | Adenocarcinoma                       | Adenoma | Control |
| 11          | 0.65                | 0.74           | 0.62           | 0.2500             | 0.250                                | 0.261   | 0.238   |
| 10          | 0.76                | 0.78           | 0.73           | 0.1880             | 0.150                                | 0.217   | 0.190   |
| 9           | 0.73                | 0.76           | 0.70           | 0.0938             | 0.000                                | 0.130   | 0.143   |
| 8           | 0.79                | 0.81           | 0.75           | 0.0476             | 0.000                                | 0.087   | 0.050   |
| 7           | 0.80                | 0.81           | 0.78           | 0.0476             | 0.000                                | 0.087   | 0.050   |

**Table S1. Metabolomics: A systematic feature reduction step** [Top 11 features (feature number: 20,60,92,72,14,88,8,71,70,55,30)]

The chemometric tools were used in conjunction to identify and select a subset of features that achieves high classification accuracy in distinguishing adenocarcinoma, adenoma, and control group with fewer variables, a systematic feature reduction step was conducted. As per one way ANOVA, and VIP score top 11 metabolites (feature number (from 1 to 11): 20,60,92,72,14,88,8,71,70,55,30) were same. While according to MCA score from RF out of 11 there were 8 metabolites common with the above list. The top 11 metabolites which were common in ANOVA and VIP were again projected turn by turn by reducing one feature which was a least significant in time of p-value and VIP score at a time (as shown in Table S1).

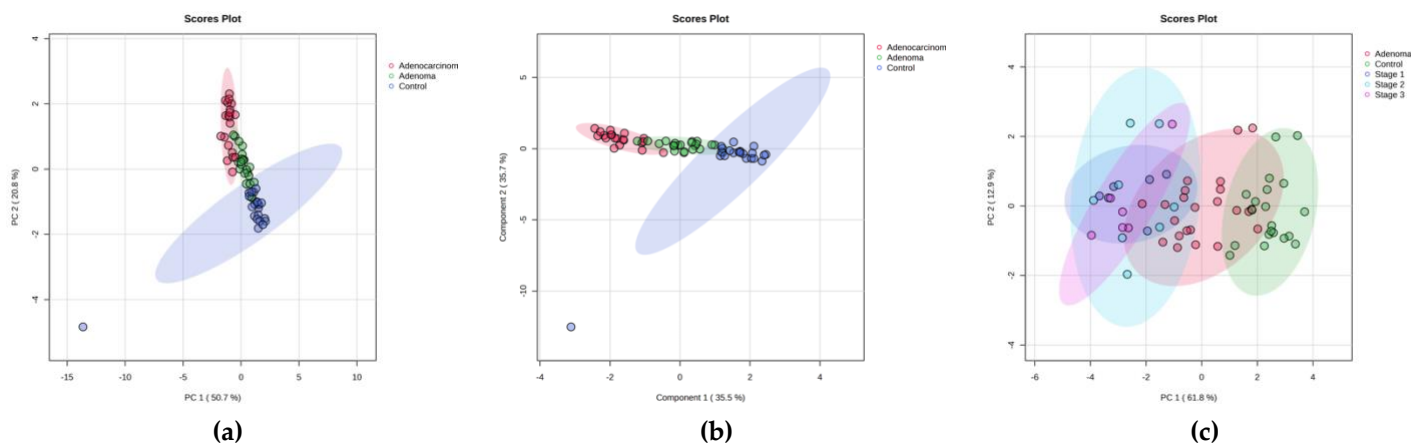

**Figure S5. Metabolomics: Unsupervised screening with selected features (a)** PCA score plot for three different groups: control, adenoma, adenocarcinoma. (control sample no 47 at bottom left corner) **(b)** PLS-DA score plot for three different groups: control, adenoma, adenocarcinoma. (control sample no 47 at bottom left corner) **(c)** PCA score plot: Here, adenocarcinoma is divided in three stages based on pTNM staging: Stage 1, Stage 2, and stage 3 (without sample no 47)

## Lipidomics: QC Chart (Pooled human plasma)

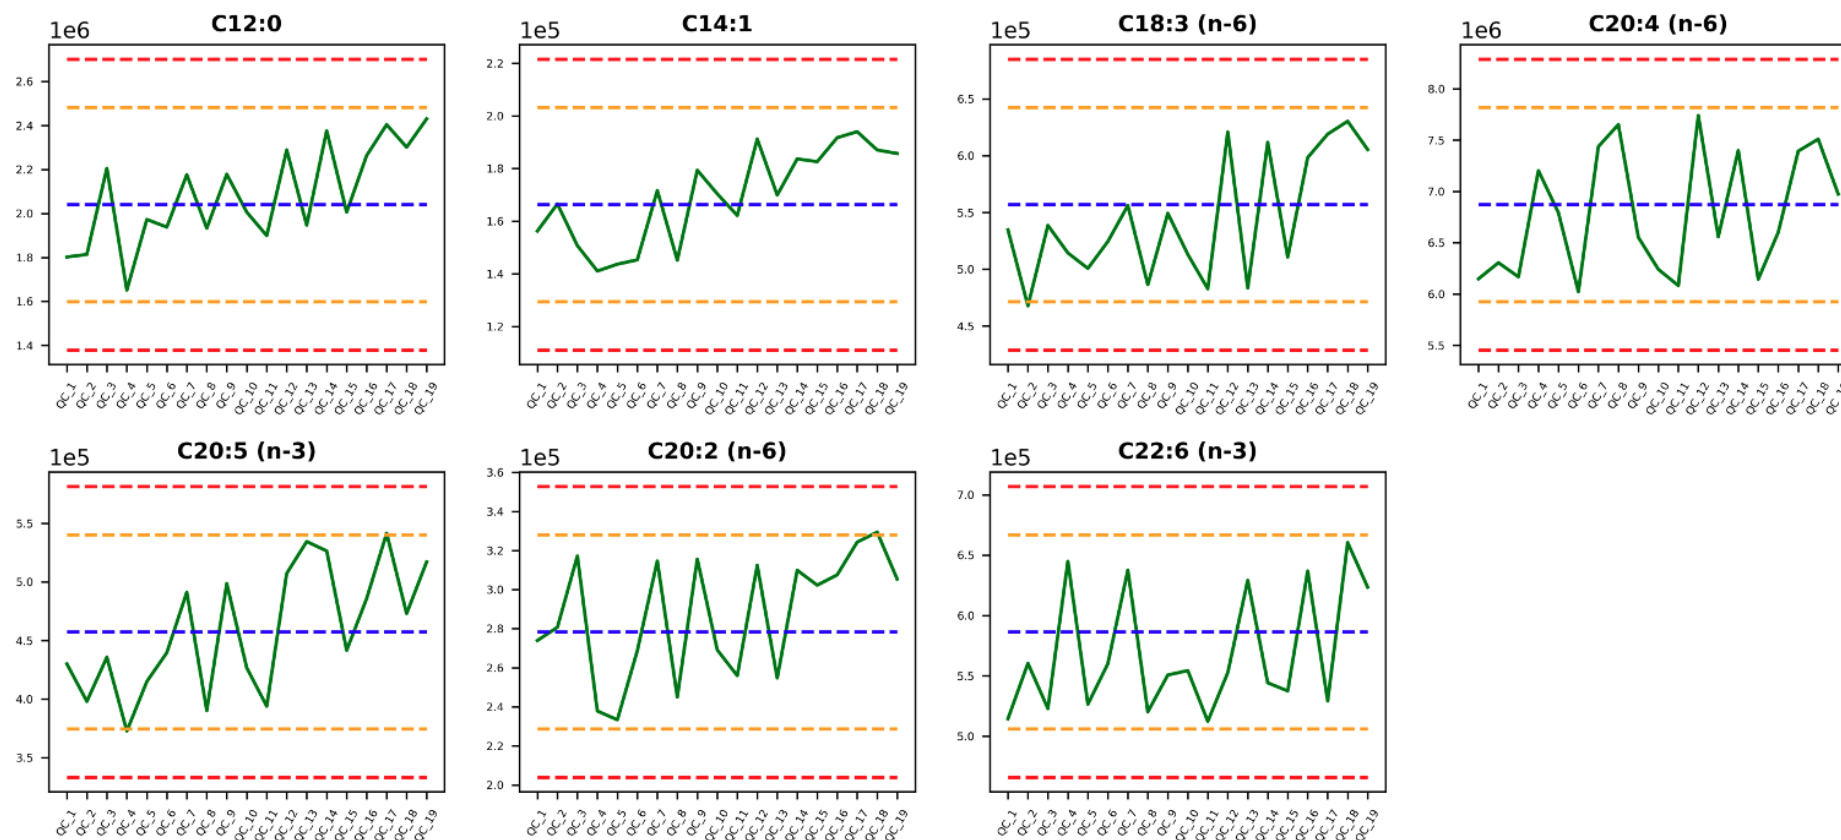

Figure S6: Lipidomics: QC Chart



## Metabolomics: QC Chart (Pooled human plasma)

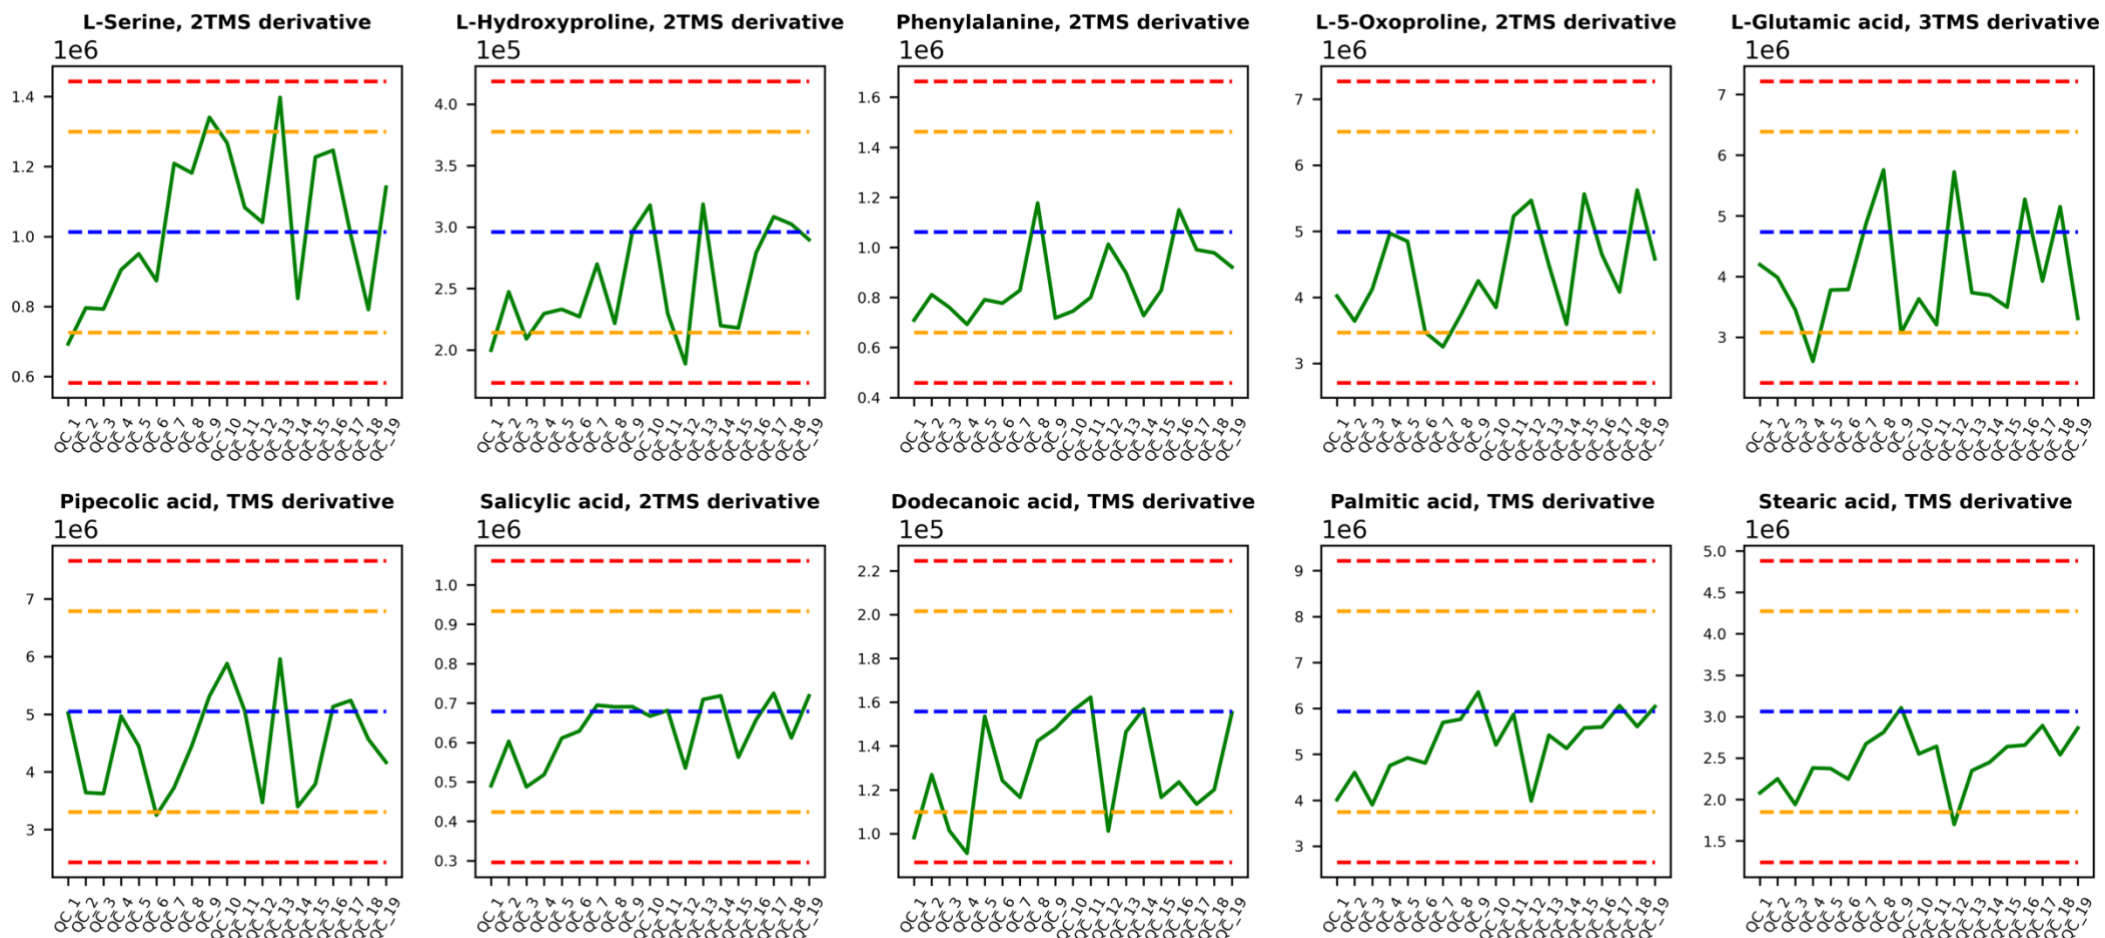

Figure S7: Metabolomics: QC Chart
